# Supplementary material
Source: bioRxiv or medRxiv preprint supplement (https://www.biorxiv.org/highwire/filestream/53728/field_highwire_adjunct_files/7/178806-3.pdf)
Supplement: Supplementary file [file 178806-3.pdf]

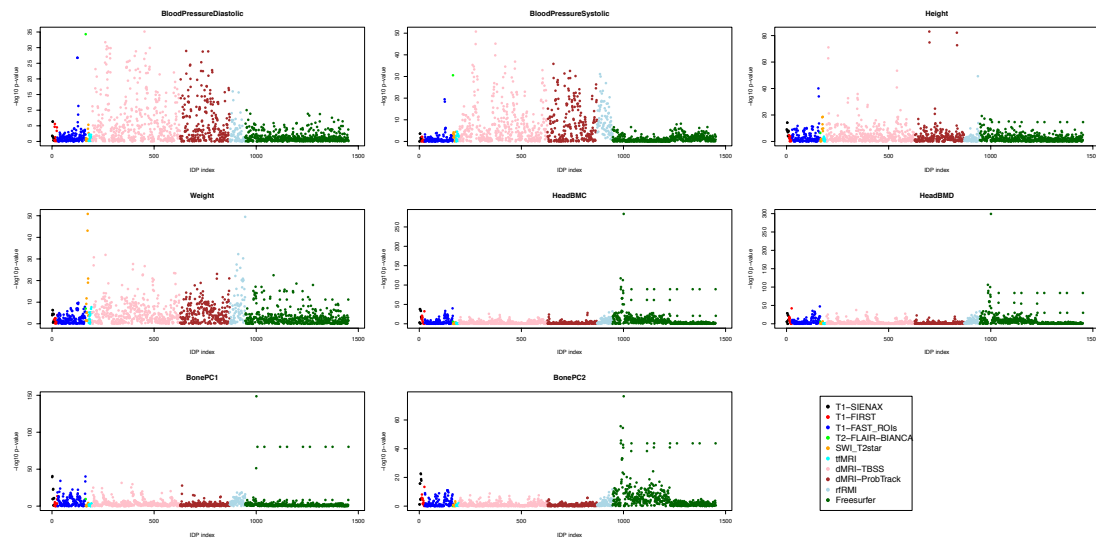

**Supplementary Figure S3. Association of IDPs with Body Confounds.** Each plot shows the association of a body confound measure with all of the IDPs except the resting fMRI parcellation edges.
